# Supplementary material for: Synthesis and computational aspects of Al(ii)–Al(ii) and Ga(ii)–Ga(ii) dihalides based on an amidinate scaffold
Source: Royal Society of Chemistry journal article supplement (doi:10.1039/d2dt00317a), 2022-01-01
Supplement: d2dt00317a1.pdf [file d2dt00317a1.pdf]

## Supporting Information

### Synthesis and computational aspects of Al(II)- Al(II) and Ga(II)-Ga(II) dihalides based on an amidinate scaffold

Arun Kumar,<sup>a</sup> Samya Banerjee,<sup>b\*</sup> Nishant Sharma,<sup>c</sup> Mohd Nazish,<sup>a</sup> Nico Graw,<sup>a</sup> Regine Herbst-Irmer,<sup>a</sup> Dietmar D. Stalke,<sup>a,\*</sup> Upakarasamy Lourderaj,<sup>c\*</sup> and Herbert W. Roesky<sup>a,\*</sup>

<sup>a</sup> *Institut für Anorganische Chemie, Georg-August-Universität Göttingen, 37077 Göttingen, Germany*  
*E-mail: hroesky@gwdg.de, dstalke@chemie.uni-goettingen.de*

<sup>b</sup> *Dept of Chemistry, Indian Institute of Technology (BHU), Varanasi, Uttar Pradesh 221005, India. E-mail: samya.chy@itbhu.ac.in.*

<sup>c</sup> *School of Chemical Sciences, National Institute of Science Education and Research (NISER) Bhubaneswar, HBNI, P. O. Jatni, Khurda, Odisha, India. E-mail: u.lourderaj@niser.ac.in*

### Table of contents

Experimental

X-ray crystallography

Computational details

References

## Experimental

### Materials and methods

All reactions and handling of reagents were performed using standard Schlenk and glovebox techniques under an atmosphere of high purity N<sub>2</sub>. Commercial reagents were purchased from Aldrich, Acros, or Alfa-Aesar Chemical Co. and used as received. Compound **2** was synthesised via reported procedure. Toluene, was distilled over Na/K alloy (25 : 75) and diethyl ether was distilled over potassium mirror. C<sub>6</sub>D<sub>6</sub> was dried by stirring for 2 days over Na/K alloy followed by distillation in a vacuum and degassed. <sup>1</sup>H, <sup>13</sup>C{<sup>1</sup>H} NMR spectra were recorded on Bruker Avance 400, and Bruker Avance 500 MHz NMR spectrometers and were referenced to the TMS. Elemental analysis was performed by the Analytisches Labor für Anorganische Chemie at the university of Göttingen.

### Compound 3

Compound **2** (1.5 g, 4 mmol) and KC<sub>8</sub> (1.08 g, 8 mmol) was placed in a 100 mL Schlenk flask and 50 mL of toluene was added at -78 °C, the reaction mixture was then allowed to warm to room temperature and stirred for another 12 h. After filtration of the insoluble residue, the solution was concentrated to 5 mL under vacuum, which gave white coloured single crystals of **3** at -30 °C (yield 1.5 g, 56%).

Elemental Analysis (%) calculated for C<sub>30</sub>H<sub>46</sub>Cl<sub>2</sub>Ga<sub>2</sub>N<sub>4</sub>: C, 53.54; H, 6.89; N, 8.32; found: C, 53.29; H, 6.97; N, 8.17. <sup>1</sup>H NMR (400 MHz, C<sub>6</sub>D<sub>6</sub>, 25 °C): δ 1.28ppm (s, 18H, <sup>t</sup>Bu), 7.06–7.5 ppm (m, 5H, Ph). <sup>13</sup>C{<sup>1</sup>H} NMR (125.7 MHz, C<sub>6</sub>D<sub>6</sub>, 25 °C): δ 31.1 (<sup>t</sup>Bu), 34.5 (<sup>t</sup>Bu), 51.5 (<sup>t</sup>Bu), 127.3, 127.6, 127.9, 130.9(Ph), 176.1 ppm (NCN).

### Compound 4

PhLi (4 mL, 10 mmol, 2.5 molar in dibutyl ether) was added to a solution of bis(2,6-diisopropylphenyl)carbodiimide (3.62 g, 10 mmol) in 50 mL diethyl ether at -78 °C under nitrogen atmosphere. The reaction mixture was then allowed to come to ambient temperature. This reaction mixture was then added to the Et<sub>2</sub>O solution of AlI<sub>3</sub> (4.07 g, 10 mmol) at -78 °C. The resultant reaction mixture was stirred overnight and allowed to achieve room

temperature. The precipitate of LiI was filtered off. After removal of all the volatiles, *ca.* 10 mL solution was stored at  $-4\text{ }^{\circ}\text{C}$  in a freezer for 1 day to afford colourless crystals of **1**. Compound **1** (2 g, 2 mmol) and  $\text{KC}_8$  (540 mg, 4 mmol) was placed in a 100 mL Schlenk flask and 40 mL of toluene was added at  $-78\text{ }^{\circ}\text{C}$ , the reaction mixture was then allowed to warm to room temperature and stirred for 12 h. After filtration of the insoluble residue, the solution was concentrated to 5 mL under vacuum, which gave white coloured single crystals of **4** at  $-30\text{ }^{\circ}\text{C}$  (yield 1.6 g, 67%).

Elemental Analysis (%) calculated for  $\text{C}_{62}\text{H}_{78}\text{Al}_2\text{I}_2\text{N}_4$ : C, 62.73; H, 6.62; N, 4.72; found: C, 62.52; H, 6.83; N, 4.61.  $^1\text{H}$  NMR (400 MHz,  $\text{C}_6\text{D}_6$ ,  $25\text{ }^{\circ}\text{C}$ ):  $\delta$  0.84 ppm (d, 12H, Dipp) 1.35 ppm (d, 12H, Dipp), 3.67 (sep, 4H, Dipp C-H), 6.47–6.58 ppm (m, 3H, Dipp), 6.95 ppm (d, 1H, Dipp), 6.98 ppm (s, 2H, Dipp), 7.04–7.10 ppm (m, 5H, Ph).  $^{13}\text{C}\{^1\text{H}\}$  NMR (125.7 MHz,  $\text{C}_6\text{D}_6$ ,  $25\text{ }^{\circ}\text{C}$ ):  $\delta$  26.9 (*i*pr), 28.7 (*i*pr), 124.28, 127.35, 127.67, 128.0, 130.5, 131.8, 135.24 (Ph), 144.10 ppm (NCN).

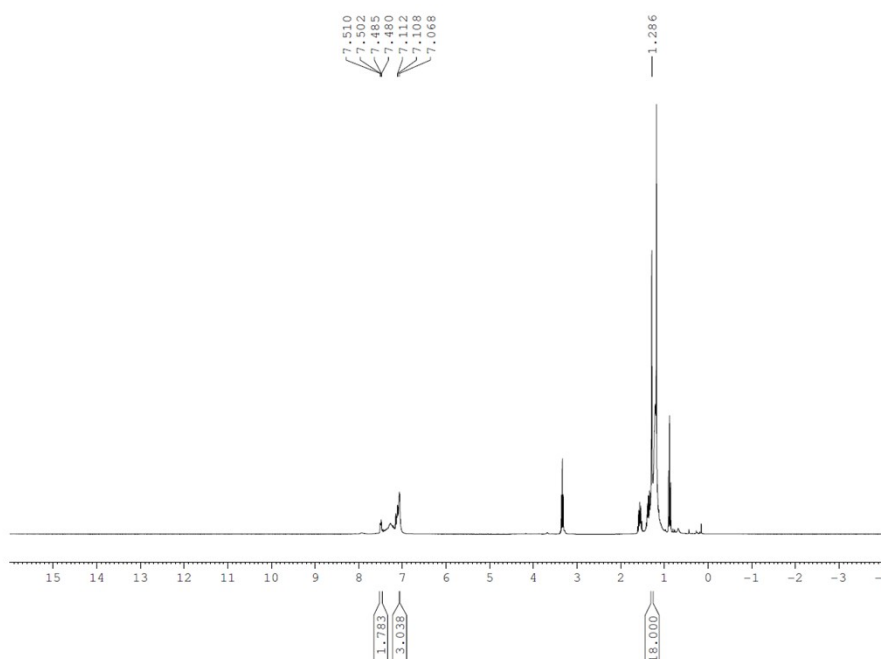

**Figure S1:**  $^1\text{H}$  NMR spectrum of compound **3**.

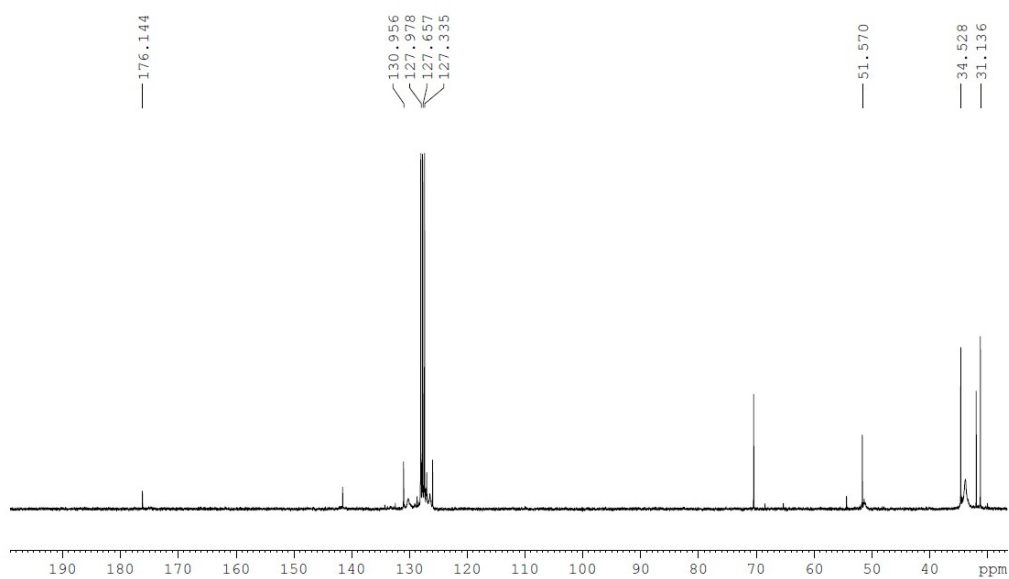

**Figure S2:**  $^1\text{H}$  NMR spectrum of compound **3**.

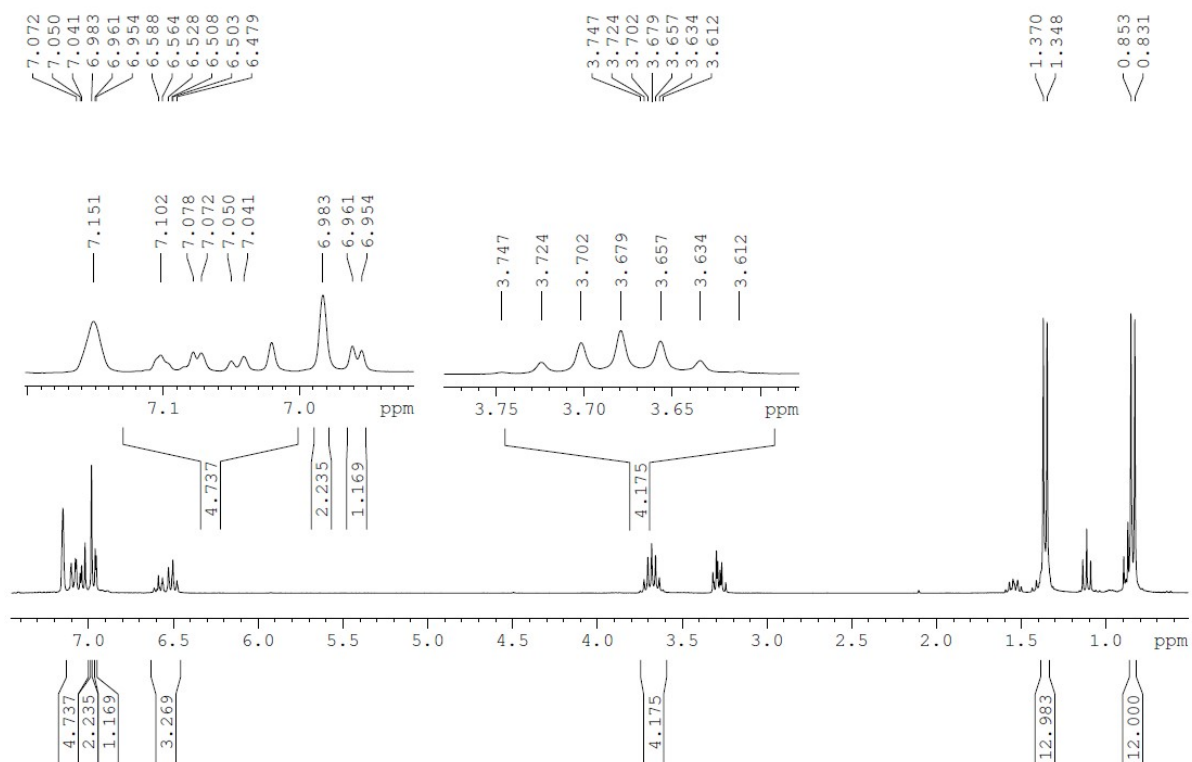

**Figure S3:**  $^1\text{H}$  NMR spectrum of compound **4**. (Unassigned resonances in the aliphatic region belongs to dibutyl ether protons)

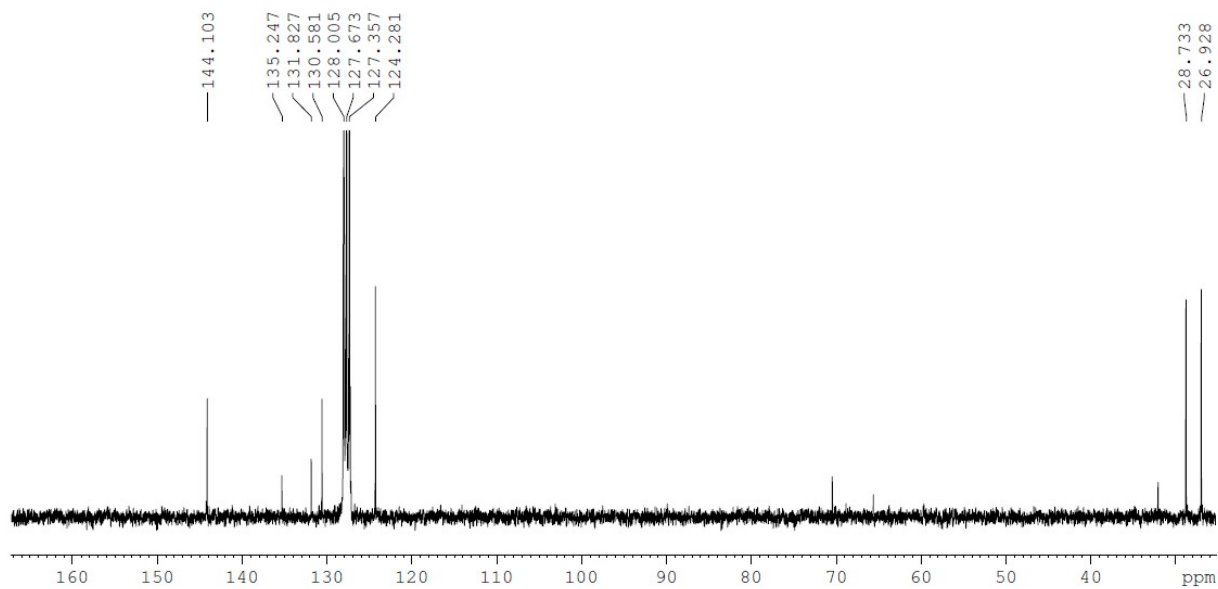

**Figure S4:**  $^{13}\text{C}$  NMR spectrum of compound **4**

## X-ray Crystallography

Single-crystals of compounds **1-4**, suitable for X-ray analysis were mounted in inert oil. The diffraction data were collected at 100(2) K on a Bruker D8 three-circle diffractometer equipped with a SMART APEX II CCD detector and an INCOATEC Mo microsource with INCOATEC Quazar mirror optics ( $\lambda=0.71073$ ).<sup>[2]</sup> The data were integrated with SAINT<sup>[3]</sup> and an empirical absorption correction with SADABS<sup>[4]</sup> was applied. For **2** and **3** TWINABS<sup>[5]</sup> was used. The structures were solved by SHELXT<sup>[6]</sup> and refined on F<sup>2</sup> using SHELXL<sup>[7]</sup> in the graphical user interface ShelXle.<sup>[8]</sup> All non-hydrogen atoms were refined with anisotropic-displacement parameters. The hydrogen atoms were refined using a riding model with their  $U_{iso}$  values constrained to 1.5  $U_{eq}$  of their pivot atoms for terminal sp<sup>3</sup> carbon atoms and 1.2 times for all other carbon atoms unless stated otherwise.

The Crystallographic Information Files (CIF) can be obtained free of charge from the Cambridge Crystallographic Data Centre using the reference numbers 2144443-2144447

**Table S1:** Crystal data and structure refinement of **1-4**.

| Compound                    | <b>1</b>                                                            | <b>2</b>                                                            | <b>2a</b>                                                           | <b>3</b>                                                                       | <b>4</b>                                                                      |
|-----------------------------|---------------------------------------------------------------------|---------------------------------------------------------------------|---------------------------------------------------------------------|--------------------------------------------------------------------------------|-------------------------------------------------------------------------------|
| Empirical formula           | C <sub>31</sub> H <sub>39</sub> AlI <sub>2</sub> N <sub>2</sub>     | C <sub>15</sub> H <sub>23</sub> Cl <sub>2</sub> GaN <sub>2</sub>    | C <sub>15</sub> H <sub>25</sub> Cl <sub>4</sub> GaN <sub>2</sub>    | C <sub>30</sub> H <sub>46</sub> Cl <sub>2</sub> Ga <sub>2</sub> N <sub>4</sub> | C <sub>76</sub> H <sub>94</sub> Al <sub>2</sub> I <sub>2</sub> N <sub>4</sub> |
| CCDC number                 | 2144443                                                             | 2144444                                                             | 2144445                                                             | 2144446                                                                        | 2144447                                                                       |
| Formula weight              | 720.42                                                              | 371.97                                                              | 444.89                                                              | 673.05                                                                         | 1371.31                                                                       |
| Temperature [K]             | 100(2)                                                              | 100(2)                                                              | 100(2)                                                              | 100(2)                                                                         | 100(2)                                                                        |
| Wavelength [Å]              | 0.71073                                                             | 0.71073                                                             | 0.71073                                                             | 0.71073                                                                        | 0.71073                                                                       |
| Crystal system              | Trigonal                                                            | Monoclinic                                                          | Orthorhombic                                                        | Monoclinic                                                                     | Monoclinic                                                                    |
| Space group                 | <i>P</i> <sub>3</sub> <i>1</i> <i>2</i> <i>1</i>                    | <i>C</i> <sub>2</sub> / <i>c</i>                                    | <i>P</i> <sub>2</sub> <i>1</i> <i>2</i> <sub>1</sub>                | <i>C</i> <sub>2</sub> / <i>c</i>                                               | <i>P</i> <sub>2</sub> <i>1</i> / <i>c</i>                                     |
| <i>a</i> [Å]                | 15.276(3)                                                           | 14.553(3)                                                           | 8.412(2)                                                            | 23.069(3)                                                                      | 14.825(2)                                                                     |
| <i>b</i> [Å]                |                                                                     | 11.340(2)                                                           | 15.856(3)                                                           | 8.896(2)                                                                       | 10.706(2)                                                                     |
| <i>c</i> [Å]                | 12.183(2)                                                           | 12.589(2)                                                           | 15.903(3)                                                           | 17.634(2)                                                                      | 22.175(3)                                                                     |
| $\beta$ [°]                 |                                                                     | 119.16(2)                                                           |                                                                     | 114.36(2)                                                                      | 93.54(2)                                                                      |
| <i>V</i> [Å <sup>3</sup> ]  | 2462.1(10)                                                          | 1814.3(6)                                                           | 2121.2(8)                                                           | 3296.7(10)                                                                     | 3512.8(9)                                                                     |
| <i>Z</i>                    | 3                                                                   | 4                                                                   | 4                                                                   | 4                                                                              | 2                                                                             |
| $\rho$ [Mgm <sup>-3</sup> ] | 1.458                                                               | 1.362                                                               | 1.393                                                               | 1.356                                                                          | 1.297                                                                         |
| $\mu$ [mm <sup>-1</sup> ]   | 1.963                                                               | 1.804                                                               | 1.799                                                               | 1.821                                                                          | 0.964                                                                         |
| <i>F</i> (000)              | 1074                                                                | 768                                                                 | 912                                                                 | 1400                                                                           | 1420                                                                          |
| Crystal size [mm]           | 0.251 x 0.213 x 0.190                                               | 0.462 x 0.306 x 0.060                                               | 0.387 x 0.245 x 0.238                                               | 0.376 x 0.171 x 0.163                                                          | 0.721 x 0.714 x 0.216                                                         |
| $\theta$ -area [°]          | 1.539 to 26.425                                                     | 2.407 to 26.408                                                     | 1.814 to 26.355                                                     | 1.938 to 26.475                                                                | 1.376 to 26.374                                                               |
| Index ranges                | -17 ≤ <i>h</i> ≤ 19,<br>-19 ≤ <i>k</i> ≤ 16,<br>-15 ≤ <i>l</i> ≤ 15 | -18 ≤ <i>h</i> ≤ 18,<br>-14 ≤ <i>k</i> ≤ 14,<br>-15 ≤ <i>l</i> ≤ 15 | -10 ≤ <i>h</i> ≤ 10,<br>-19 ≤ <i>k</i> ≤ 17,<br>-19 ≤ <i>l</i> ≤ 19 | -28 ≤ <i>h</i> ≤ 28,<br>-11 ≤ <i>k</i> ≤ 11,<br>-22 ≤ <i>l</i> ≤ 22            | -18 ≤ <i>h</i> ≤ 18,<br>-13 ≤ <i>k</i> ≤ 13,<br>-27 ≤ <i>l</i> ≤ 27           |
| Total number reflect.       | 29077                                                               | 15526                                                               | 17672                                                               | 146235                                                                         | 46646                                                                         |
| Unique                      | 3387                                                                | 1871                                                                | 4334                                                                | 3406                                                                           | 7180                                                                          |

|                                                           |                   |                   |                   |                   |                   |
|-----------------------------------------------------------|-------------------|-------------------|-------------------|-------------------|-------------------|
| reflections                                               |                   |                   |                   |                   |                   |
| $R_{int}$                                                 | 0.0273            | 0.0267            | 0.0223            | 0.0776            | 0.0248            |
| Max. and min. transmission                                | 0.4296 and 0.3434 | 0.7454 and 0.5437 | 0.7454 and 0.6200 | 0.7454 and 0.5216 | 0.4296 and 0.3390 |
| Data / restraints / parameters                            | 3387 / 0 / 169    | 1871 / 135 / 128  | 4334 / 1 / 213    | 3406 / 0 / 178    | 7180 / 0 / 388    |
| Goodness-of-fit on $F^2$                                  | 1.061             | 1.081             | 1.025             | 1.114             | 1.075             |
| $R1 [I > 2\sigma(I)]$                                     | 0.0157            | 0.0208            | 0.0175            | 0.0337            | 0.0225            |
| $wR2 [I > 2\sigma(I)]$                                    | 0.0365            | 0.0531            | 0.0429            | 0.0768            | 0.0590            |
| $R1$ [all data]                                           | 0.0164            | 0.0217            | 0.0182            | 0.0409            | 0.0240            |
| $wR2$ [all data]                                          | 0.0369            | 0.0538            | 0.0430            | 0.0797            | 0.0598            |
| Absolute structure parameter <sup>[9]</sup>               | -0.022(6)         | -                 | 0.007(3)          |                   |                   |
| Largest diff. peak and hole [ $e \cdot \text{\AA}^{-3}$ ] | 0.389 to -0.220   | 0.390 to -0.345   | 0.482 to -0.322   | 0.505 and -0.350  | 0.756 to -0.383   |

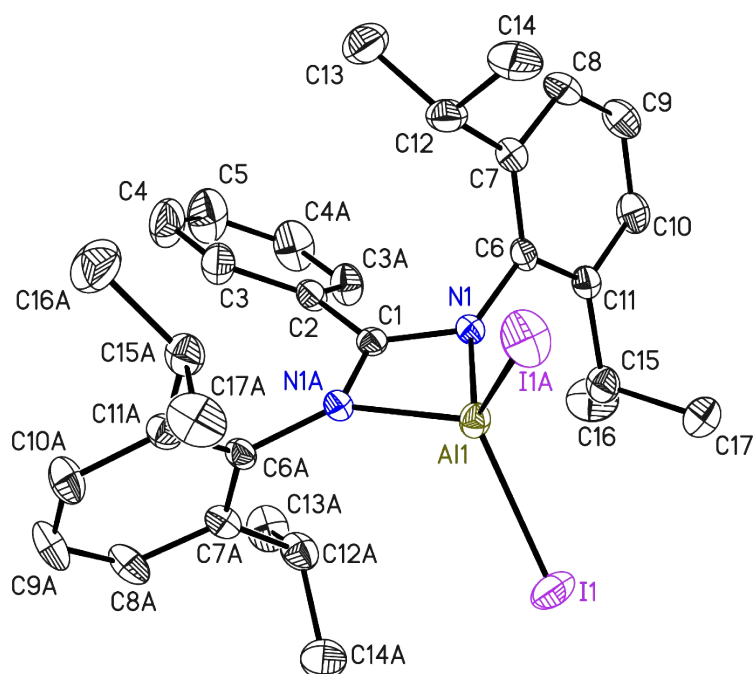

**Figure S5:** Molecular unit of **1**. The anisotropic displacement parameters are depicted at the 50% probability level. The hydrogen atoms are omitted for clarity.

**Table S2:** Bond lengths [Å] and angles [°] for **1**.

|                   |           |                   |            |
|-------------------|-----------|-------------------|------------|
| I(1)-Al(1)        | 2.4700(7) | C(1)-N(1)-Al(1)   | 89.80(16)  |
| Al(1)-N(1)        | 1.890(2)  | C(6)-N(1)-Al(1)   | 142.71(16) |
| Al(1)-C(1)        | 2.314(4)  | N(1)#1-C(1)-N(1)  | 109.5(3)   |
| N(1)-C(1)         | 1.341(3)  | N(1)-C(1)-C(2)    | 125.23(15) |
| N(1)-C(6)         | 1.433(3)  | N(1)-C(1)-Al(1)   | 54.77(15)  |
| C(1)-C(2)         | 1.475(5)  | C(2)-C(1)-Al(1)   | 180.0      |
| C(2)-C(3)         | 1.389(3)  | C(3)-C(2)-C(3)#1  | 119.4(4)   |
| C(3)-C(4)         | 1.384(4)  | C(3)-C(2)-C(1)    | 120.31(18) |
| C(4)-C(5)         | 1.374(4)  | C(4)-C(3)-C(2)    | 120.1(3)   |
| C(6)-C(11)        | 1.398(3)  | C(5)-C(4)-C(3)    | 119.8(3)   |
| C(6)-C(7)         | 1.408(3)  | C(4)#1-C(5)-C(4)  | 120.8(4)   |
| C(7)-C(8)         | 1.393(4)  | C(11)-C(6)-C(7)   | 121.8(2)   |
| C(7)-C(12)        | 1.517(4)  | C(11)-C(6)-N(1)   | 118.8(2)   |
| C(8)-C(9)         | 1.377(4)  | C(7)-C(6)-N(1)    | 119.4(2)   |
| C(9)-C(10)        | 1.378(4)  | C(8)-C(7)-C(6)    | 117.1(3)   |
| C(10)-C(11)       | 1.390(4)  | C(8)-C(7)-C(12)   | 119.0(2)   |
| C(11)-C(15)       | 1.521(4)  | C(6)-C(7)-C(12)   | 123.8(2)   |
| C(12)-C(14)       | 1.536(4)  | C(9)-C(8)-C(7)    | 121.9(3)   |
| C(12)-C(13)       | 1.536(4)  | C(8)-C(9)-C(10)   | 119.7(3)   |
| C(15)-C(16)       | 1.530(4)  | C(9)-C(10)-C(11)  | 121.3(3)   |
| C(15)-C(17)       | 1.530(4)  | C(10)-C(11)-C(6)  | 118.1(2)   |
|                   |           | C(10)-C(11)-C(15) | 119.9(2)   |
| N(1)-Al(1)-N(1)#1 | 70.86(12) | C(6)-C(11)-C(15)  | 122.0(2)   |
| N(1)-Al(1)-C(1)   | 35.43(6)  | C(7)-C(12)-C(14)  | 109.9(2)   |
| N(1)-Al(1)-I(1)   | 117.49(6) | C(7)-C(12)-C(13)  | 112.0(2)   |
| N(1)#1-Al(1)-I(1) | 115.24(6) | C(14)-C(12)-C(13) | 111.1(2)   |
| C(1)-Al(1)-I(1)   | 123.02(2) | C(11)-C(15)-C(16) | 113.3(2)   |
| I(1)-Al(1)-I(1)#1 | 113.96(4) | C(11)-C(15)-C(17) | 110.0(2)   |
| C(1)-N(1)-C(6)    | 125.0(2)  | C(16)-C(15)-C(17) | 110.0(3)   |

---

Symmetry transformations used to generate equivalent atoms:

#1 x-y,-y,-z+2/3



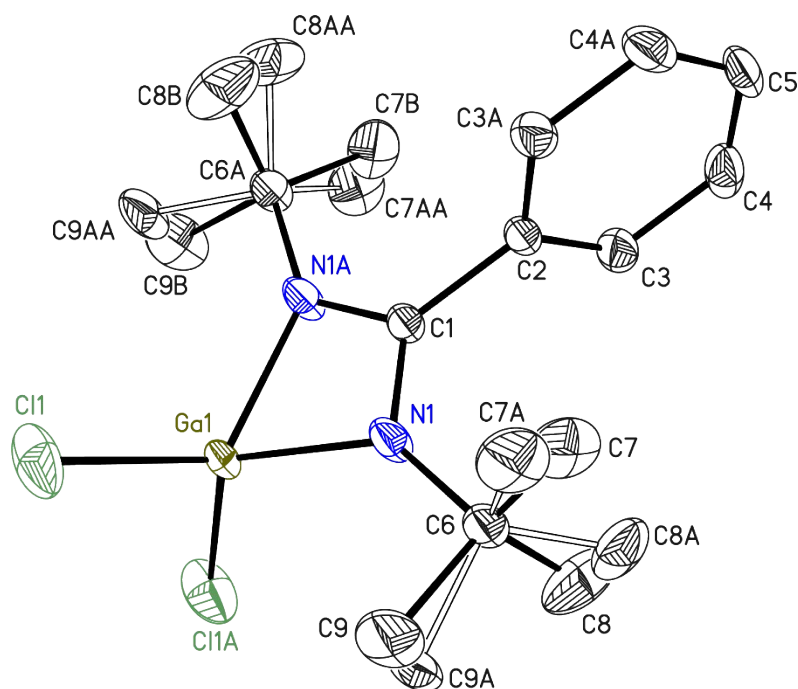

**Figure S6:** Molecular unit of **2**. The anisotropic displacement parameters are depicted at the 50% probability level. The hydrogen atoms are omitted for clarity.

The data were collected on a non-merohedral twin. The twin law is a two-fold rotation along (1 0 -1). The fractional contribution of the minor twin domain refined to 0.1416(16). Parts of the molecule (*t*Bu group: C7–C9) were disordered about two positions. The occupancy of the minor position refined to 0.429(18). All disordered groups were refined with distance restraints and restraints for the anisotropic displacement parameters.

**Table S3:** Bond lengths [Å] and angles [°] for **2**.

|                   |            |                     |             |
|-------------------|------------|---------------------|-------------|
| Ga(1)-N(1)        | 1.9415(12) | N(1)-Ga(1)-Cl(1)    | 118.55(5)   |
| Ga(1)-Cl(1)       | 2.1424(5)  | N(1)#1-Ga(1)-Cl(1)  | 118.90(5)   |
| Ga(1)-C(1)        | 2.3729(19) | Cl(1)-Ga(1)-Cl(1)#1 | 109.10(3)   |
| N(1)-C(1)         | 1.3288(16) | N(1)-Ga(1)-C(1)     | 34.05(4)    |
| N(1)-C(6)         | 1.4805(19) | Cl(1)-Ga(1)-C(1)    | 125.452(14) |
| C(1)-C(2)         | 1.501(3)   | C(1)-N(1)-C(6)      | 131.72(13)  |
| C(2)-C(3)         | 1.3878(19) | C(1)-N(1)-Ga(1)     | 91.06(9)    |
| C(3)-C(4)         | 1.397(2)   | C(6)-N(1)-Ga(1)     | 137.02(10)  |
| C(4)-C(5)         | 1.375(2)   | N(1)-C(1)-N(1)#1    | 109.78(17)  |
| C(6)-C(8)         | 1.489(8)   | N(1)-C(1)-C(2)      | 125.11(8)   |
| C(6)-C(7A)        | 1.512(7)   | N(1)-C(1)-Ga(1)     | 54.89(8)    |
| C(6)-C(7)         | 1.519(7)   | C(2)-C(1)-Ga(1)     | 180.0       |
| C(6)-C(9A)        | 1.531(5)   | C(3)-C(2)-C(3)#1    | 120.2(2)    |
| C(6)-C(8A)        | 1.533(5)   | C(3)-C(2)-C(1)      | 119.91(10)  |
| C(6)-C(9)         | 1.533(8)   | C(2)-C(3)-C(4)      | 119.52(16)  |
|                   |            | C(5)-C(4)-C(3)      | 120.17(17)  |
| N(1)-Ga(1)-N(1)#1 | 68.10(7)   | C(4)-C(5)-C(4)#1    | 120.4(2)    |

|                  |          |                  |          |
|------------------|----------|------------------|----------|
| N(1)-C(6)-C(8)   | 106.5(4) | N(1)-C(6)-C(8A)  | 113.7(3) |
| N(1)-C(6)-C(7A)  | 109.4(4) | C(7A)-C(6)-C(8A) | 110.2(3) |
| N(1)-C(6)-C(7)   | 113.7(4) | C(9A)-C(6)-C(8A) | 107.5(4) |
| C(8)-C(6)-C(7)   | 112.6(4) | N(1)-C(6)-C(9)   | 103.6(4) |
| N(1)-C(6)-C(9A)  | 106.3(3) | C(8)-C(6)-C(9)   | 113.2(5) |
| C(7A)-C(6)-C(9A) | 109.5(4) | C(7)-C(6)-C(9)   | 107.1(5) |

Symmetry transformations used to generate equivalent atoms:

#1 -x+1,y,-z+3/2

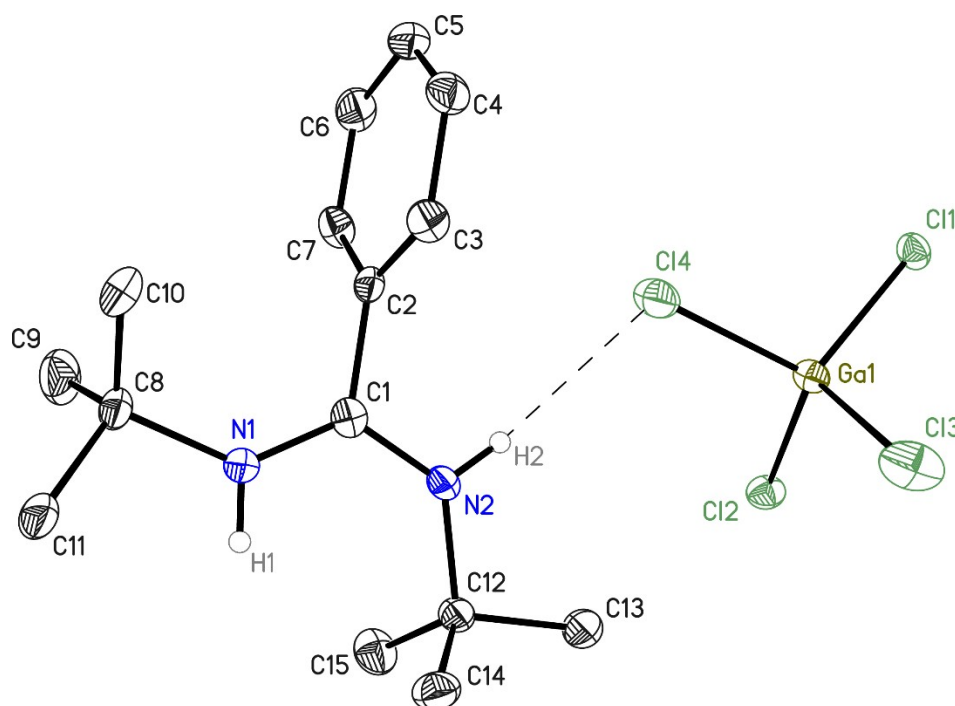

**Figure S7:** Asymmetric unit of **2a**. The anisotropic displacement parameters are depicted at the 50% probability level. Except for N-bound the hydrogen atoms are omitted for clarity.

Hydrogen atoms H1 and H2 were refined freely. All other hydrogen atoms were refined using a riding model with their  $U_{\text{iso}}$  values constrained to 1.5  $U_{\text{eq}}$  of their pivot atoms for terminal  $sp^3$  carbon atoms and 1.2 times for all other carbon atoms.

**Table S4:** Bond lengths [ $\text{\AA}$ ] and angles [ $^\circ$ ] for **2a**.

|             |           |            |           |
|-------------|-----------|------------|-----------|
| Ga(1)-Cl(2) | 2.1687(6) | C(1)-C(2)  | 1.495(3)  |
| Ga(1)-Cl(1) | 2.1712(6) | N(2)-H(2)  | 0.823(19) |
| Ga(1)-Cl(3) | 2.1747(7) | N(2)-C(12) | 1.501(3)  |
| Ga(1)-Cl(4) | 2.1786(7) | C(2)-C(7)  | 1.385(3)  |
| N(1)-H(1)   | 0.83(2)   | C(2)-C(3)  | 1.391(3)  |
| N(1)-C(1)   | 1.315(3)  | C(3)-C(4)  | 1.390(3)  |
| N(1)-C(8)   | 1.512(3)  | C(4)-C(5)  | 1.387(3)  |
| C(1)-N(2)   | 1.318(3)  | C(5)-C(6)  | 1.387(3)  |

|                   |            |                   |            |
|-------------------|------------|-------------------|------------|
| C(6)-C(7)         | 1.389(3)   | C(1)-N(2)-C(12)   | 130.75(18) |
| C(8)-C(9)         | 1.519(3)   | C(7)-C(2)-C(3)    | 120.62(19) |
| C(8)-C(10)        | 1.520(3)   | C(7)-C(2)-C(1)    | 119.92(18) |
| C(8)-C(11)        | 1.522(3)   | C(3)-C(2)-C(1)    | 119.43(19) |
| C(12)-C(14)       | 1.523(3)   | C(4)-C(3)-C(2)    | 119.28(19) |
| C(12)-C(13)       | 1.529(3)   | C(5)-C(4)-C(3)    | 120.3(2)   |
| C(12)-C(15)       | 1.536(3)   | C(4)-C(5)-C(6)    | 120.0(2)   |
|                   |            | C(5)-C(6)-C(7)    | 120.1(2)   |
| Cl(2)-Ga(1)-Cl(1) | 109.90(3)  | C(2)-C(7)-C(6)    | 119.7(2)   |
| Cl(2)-Ga(1)-Cl(3) | 108.96(2)  | N(1)-C(8)-C(9)    | 108.69(19) |
| Cl(1)-Ga(1)-Cl(3) | 109.49(3)  | N(1)-C(8)-C(10)   | 113.00(18) |
| Cl(2)-Ga(1)-Cl(4) | 109.42(3)  | C(9)-C(8)-C(10)   | 111.16(19) |
| Cl(1)-Ga(1)-Cl(4) | 109.66(2)  | N(1)-C(8)-C(11)   | 103.58(17) |
| Cl(3)-Ga(1)-Cl(4) | 109.40(3)  | C(9)-C(8)-C(11)   | 111.0(2)   |
| H(1)-N(1)-C(1)    | 114.3(19)  | C(10)-C(8)-C(11)  | 109.2(2)   |
| H(1)-N(1)-C(8)    | 113.2(19)  | N(2)-C(12)-C(14)  | 111.09(17) |
| C(1)-N(1)-C(8)    | 132.52(19) | N(2)-C(12)-C(13)  | 104.54(16) |
| N(1)-C(1)-N(2)    | 122.80(19) | C(14)-C(12)-C(13) | 109.6(2)   |
| N(1)-C(1)-C(2)    | 121.88(19) | N(2)-C(12)-C(15)  | 109.90(18) |
| N(2)-C(1)-C(2)    | 115.32(18) | C(14)-C(12)-C(15) | 112.03(18) |
| H(2)-N(2)-C(1)    | 112.6(16)  | C(13)-C(12)-C(15) | 109.45(17) |
| H(2)-N(2)-C(12)   | 116.2(16)  |                   |            |

**Table S5:** Hydrogen bonds for **2a** [ $\text{\AA}$  and  $^\circ$ ].

| D-H...A           | d(D-H)    | d(H...A)  | d(D...A) | $\angle$ (DHA) |
|-------------------|-----------|-----------|----------|----------------|
| N(2)-H(2)...Cl(4) | 0.823(19) | 2.587(19) | 3.406(2) | 173(2)         |

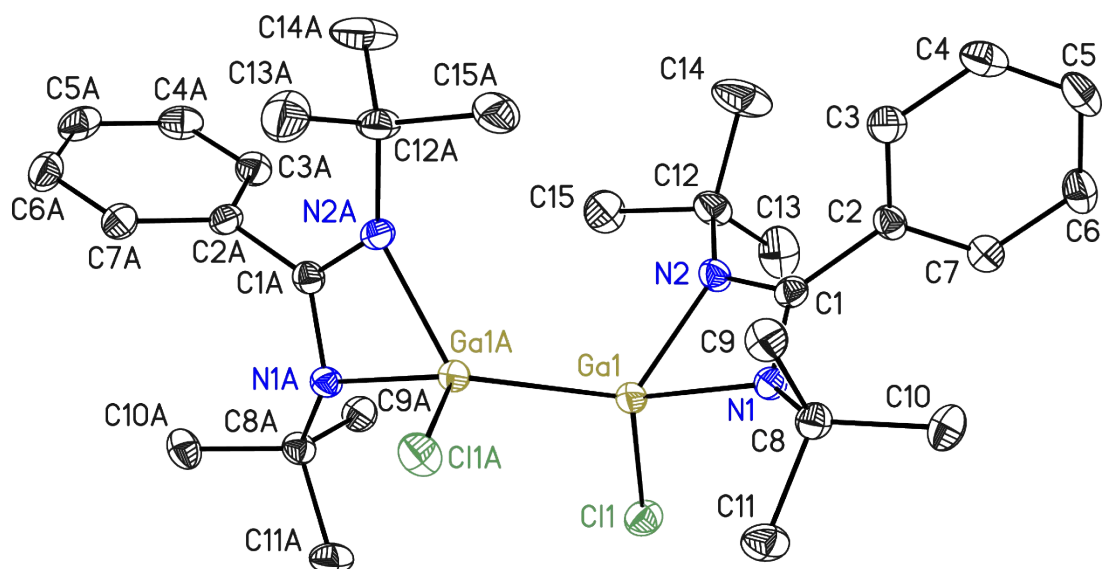

**Figure S8:** Molecular unit of **3**. The anisotropic displacement parameters are depicted at the 50% probability level. The hydrogen atoms are omitted for clarity.

Data were collected on a split crystal with three components. The final refinement was done on untwinned merged data from all domains.

**Table S6:** Bond lengths [Å] and angles [°] for **3**.

|               |            |                     |            |
|---------------|------------|---------------------|------------|
| Ga(1)-N(2)    | 1.9795(19) |                     |            |
| Ga(1)-N(1)    | 1.9807(19) | N(2)-Ga(1)-N(1)     | 67.26(8)   |
| Ga(1)-Cl(1)   | 2.2126(8)  | N(2)-Ga(1)-Cl(1)    | 109.22(6)  |
| Ga(1)-Ga(1)#1 | 2.4053(6)  | N(1)-Ga(1)-Cl(1)    | 111.23(6)  |
| Ga(1)-C(1)    | 2.413(2)   | N(2)-Ga(1)-Ga(1)#1  | 121.11(6)  |
| N(1)-C(1)     | 1.344(3)   | N(1)-Ga(1)-Ga(1)#1  | 122.66(6)  |
| N(1)-C(8)     | 1.482(3)   | Cl(1)-Ga(1)-Ga(1)#1 | 116.01(3)  |
| N(2)-C(1)     | 1.331(3)   | N(2)-Ga(1)-C(1)     | 33.46(8)   |
| N(2)-C(12)    | 1.474(3)   | N(1)-Ga(1)-C(1)     | 33.85(7)   |
| C(1)-C(2)     | 1.493(3)   | Cl(1)-Ga(1)-C(1)    | 115.96(6)  |
| C(2)-C(7)     | 1.389(3)   | Ga(1)#1-Ga(1)-C(1)  | 127.93(5)  |
| C(2)-C(3)     | 1.394(3)   | C(1)-N(1)-C(8)      | 128.81(19) |
| C(3)-C(4)     | 1.386(3)   | C(1)-N(1)-Ga(1)     | 90.98(14)  |
| C(4)-C(5)     | 1.383(4)   | C(8)-N(1)-Ga(1)     | 133.63(15) |
| C(5)-C(6)     | 1.385(4)   | C(1)-N(2)-C(12)     | 131.0(2)   |
| C(6)-C(7)     | 1.387(3)   | C(1)-N(2)-Ga(1)     | 91.43(14)  |
| C(8)-C(11)    | 1.528(3)   | C(12)-N(2)-Ga(1)    | 136.52(15) |
| C(8)-C(9)     | 1.529(3)   | N(2)-C(1)-N(1)      | 110.2(2)   |
| C(8)-C(10)    | 1.531(3)   | N(2)-C(1)-C(2)      | 125.6(2)   |
| C(12)-C(14)   | 1.520(4)   | N(1)-C(1)-C(2)      | 124.3(2)   |
| C(12)-C(15)   | 1.528(3)   | N(2)-C(1)-Ga(1)     | 55.11(12)  |
| C(12)-C(13)   | 1.530(4)   | N(1)-C(1)-Ga(1)     | 55.17(11)  |

|                   |            |
|-------------------|------------|
| C(2)-C(1)-Ga(1)   | 177.17(17) |
| C(7)-C(2)-C(3)    | 119.8(2)   |
| C(7)-C(2)-C(1)    | 119.8(2)   |
| C(3)-C(2)-C(1)    | 120.4(2)   |
| C(4)-C(3)-C(2)    | 120.0(2)   |
| C(5)-C(4)-C(3)    | 119.9(2)   |
| C(4)-C(5)-C(6)    | 120.3(2)   |
| C(5)-C(6)-C(7)    | 120.1(2)   |
| C(6)-C(7)-C(2)    | 119.9(2)   |
| N(1)-C(8)-C(11)   | 105.12(18) |
| N(1)-C(8)-C(9)    | 109.53(19) |
| C(11)-C(8)-C(9)   | 109.3(2)   |
| N(1)-C(8)-C(10)   | 113.3(2)   |
| C(11)-C(8)-C(10)  | 108.6(2)   |
| C(9)-C(8)-C(10)   | 110.8(2)   |
| N(2)-C(12)-C(14)  | 113.3(2)   |
| N(2)-C(12)-C(15)  | 104.9(2)   |
| C(14)-C(12)-C(15) | 108.7(2)   |
| N(2)-C(12)-C(13)  | 109.8(2)   |
| C(14)-C(12)-C(13) | 110.7(2)   |
| C(15)-C(12)-C(13) | 109.2(2)   |

---

Symmetry transformations used to generate  
equivalent atoms:

#1  $-x+1, y, -z+1/2$

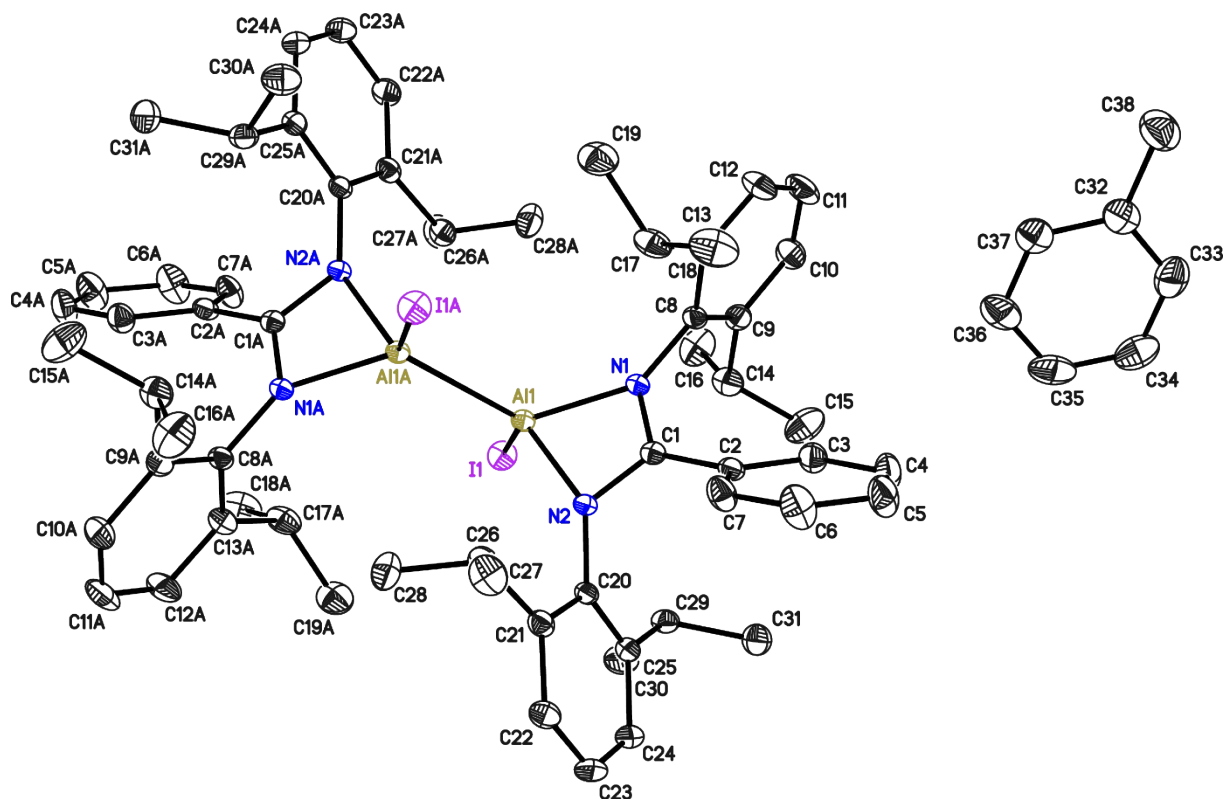

**Figure S9:** Molecular unit of **4**. The anisotropic displacement parameters are depicted at the 50% probability level. The hydrogen atoms are omitted for clarity.

**Table S7:** Bond lengths [ $\text{\AA}$ ] and angles [ $^\circ$ ] for **4**.

|               |            |             |          |
|---------------|------------|-------------|----------|
| I(1)-Al(1)    | 2.5469(6)  | C(9)-C(10)  | 1.396(2) |
| Al(1)-N(2)    | 1.9145(14) | C(9)-C(14)  | 1.525(2) |
| Al(1)-N(1)    | 1.9466(14) | C(10)-C(11) | 1.380(3) |
| Al(1)-C(1)    | 2.3521(16) | C(11)-C(12) | 1.378(3) |
| Al(1)-Al(1)#1 | 2.5803(10) | C(12)-C(13) | 1.400(2) |
| N(1)-C(1)     | 1.341(2)   | C(13)-C(17) | 1.517(2) |
| N(1)-C(8)     | 1.439(2)   | C(14)-C(16) | 1.531(3) |
| C(1)-N(2)     | 1.344(2)   | C(14)-C(15) | 1.535(3) |
| C(1)-C(2)     | 1.486(2)   | C(17)-C(19) | 1.537(3) |
| N(2)-C(20)    | 1.4321(19) | C(17)-C(18) | 1.537(3) |
| C(2)-C(3)     | 1.391(2)   | C(20)-C(25) | 1.407(2) |
| C(2)-C(7)     | 1.395(2)   | C(20)-C(21) | 1.410(2) |
| C(3)-C(4)     | 1.392(3)   | C(21)-C(22) | 1.397(2) |
| C(4)-C(5)     | 1.379(3)   | C(21)-C(26) | 1.516(2) |
| C(5)-C(6)     | 1.390(3)   | C(22)-C(23) | 1.379(3) |
| C(6)-C(7)     | 1.388(3)   | C(23)-C(24) | 1.386(3) |
| C(8)-C(13)    | 1.406(2)   | C(24)-C(25) | 1.404(2) |
| C(8)-C(9)     | 1.412(2)   | C(25)-C(29) | 1.521(2) |

|                    |            |                   |            |
|--------------------|------------|-------------------|------------|
| C(26)-C(27)        | 1.531(2)   | C(4)-C(5)-C(6)    | 119.83(17) |
| C(26)-C(28)        | 1.541(2)   | C(7)-C(6)-C(5)    | 120.11(18) |
| C(29)-C(31)        | 1.533(2)   | C(6)-C(7)-C(2)    | 120.20(17) |
| C(29)-C(30)        | 1.536(2)   | C(13)-C(8)-C(9)   | 120.94(14) |
| C(32)-C(37)        | 1.390(3)   | C(13)-C(8)-N(1)   | 120.64(14) |
| C(32)-C(33)        | 1.399(3)   | C(9)-C(8)-N(1)    | 118.36(14) |
| C(32)-C(38)        | 1.499(3)   | C(10)-C(9)-C(8)   | 118.32(16) |
| C(33)-C(34)        | 1.380(3)   | C(10)-C(9)-C(14)  | 118.77(16) |
| C(34)-C(35)        | 1.386(4)   | C(8)-C(9)-C(14)   | 122.91(15) |
| C(35)-C(36)        | 1.381(3)   | C(11)-C(10)-C(9)  | 121.29(17) |
| C(36)-C(37)        | 1.379(3)   | C(12)-C(11)-C(10) | 119.84(16) |
|                    |            | C(11)-C(12)-C(13) | 121.54(18) |
| N(2)-Al(1)-N(1)    | 69.39(6)   | C(12)-C(13)-C(8)  | 118.05(16) |
| N(2)-Al(1)-C(1)    | 34.85(5)   | C(12)-C(13)-C(17) | 118.63(16) |
| N(1)-Al(1)-C(1)    | 34.77(5)   | C(8)-C(13)-C(17)  | 123.32(14) |
| N(2)-Al(1)-I(1)    | 113.53(4)  | C(9)-C(14)-C(16)  | 111.51(16) |
| N(1)-Al(1)-I(1)    | 109.92(4)  | C(9)-C(14)-C(15)  | 112.37(16) |
| C(1)-Al(1)-I(1)    | 119.76(4)  | C(16)-C(14)-C(15) | 108.75(15) |
| N(2)-Al(1)-Al(1)#1 | 115.03(5)  | C(13)-C(17)-C(19) | 111.38(16) |
| N(1)-Al(1)-Al(1)#1 | 121.48(5)  | C(13)-C(17)-C(18) | 111.47(17) |
| C(1)-Al(1)-Al(1)#1 | 122.09(5)  | C(19)-C(17)-C(18) | 110.15(16) |
| I(1)-Al(1)-Al(1)#1 | 118.11(3)  | C(25)-C(20)-C(21) | 121.21(14) |
| C(1)-N(1)-C(8)     | 124.89(13) | C(25)-C(20)-N(2)  | 119.08(14) |
| C(1)-N(1)-Al(1)    | 89.38(9)   | C(21)-C(20)-N(2)  | 119.64(14) |
| C(8)-N(1)-Al(1)    | 144.90(10) | C(22)-C(21)-C(20) | 118.19(15) |
| N(1)-C(1)-N(2)     | 109.85(13) | C(22)-C(21)-C(26) | 120.29(15) |
| N(1)-C(1)-C(2)     | 126.03(14) | C(20)-C(21)-C(26) | 121.42(14) |
| N(2)-C(1)-C(2)     | 123.89(14) | C(23)-C(22)-C(21) | 121.31(16) |
| N(1)-C(1)-Al(1)    | 55.85(8)   | C(22)-C(23)-C(24) | 120.02(16) |
| N(2)-C(1)-Al(1)    | 54.48(8)   | C(23)-C(24)-C(25) | 121.06(16) |
| C(2)-C(1)-Al(1)    | 169.34(12) | C(24)-C(25)-C(20) | 118.02(15) |
| C(1)-N(2)-C(20)    | 124.05(13) | C(24)-C(25)-C(29) | 119.06(15) |
| C(1)-N(2)-Al(1)    | 90.67(10)  | C(20)-C(25)-C(29) | 122.88(14) |
| C(20)-N(2)-Al(1)   | 144.47(11) | C(21)-C(26)-C(27) | 113.95(15) |
| C(3)-C(2)-C(7)     | 119.36(16) | C(21)-C(26)-C(28) | 109.05(14) |
| C(3)-C(2)-C(1)     | 122.51(15) | C(27)-C(26)-C(28) | 110.62(15) |
| C(7)-C(2)-C(1)     | 118.08(15) | C(25)-C(29)-C(31) | 112.02(14) |
| C(2)-C(3)-C(4)     | 120.03(17) | C(25)-C(29)-C(30) | 110.96(14) |
| C(5)-C(4)-C(3)     | 120.43(18) | C(31)-C(29)-C(30) | 110.27(15) |

|                   |          |                   |          |
|-------------------|----------|-------------------|----------|
| C(37)-C(32)-C(33) | 118.1(2) | C(33)-C(34)-C(35) | 119.9(2) |
| C(37)-C(32)-C(38) | 121.0(2) | C(36)-C(35)-C(34) | 119.9(2) |
| C(33)-C(32)-C(38) | 120.9(2) | C(37)-C(36)-C(35) | 120.1(2) |
| C(34)-C(33)-C(32) | 120.9(2) | C(36)-C(37)-C(32) | 121.1(2) |

Symmetry transformations used to generate equivalent atoms:

#1 -x+2,-y+1,-z+1

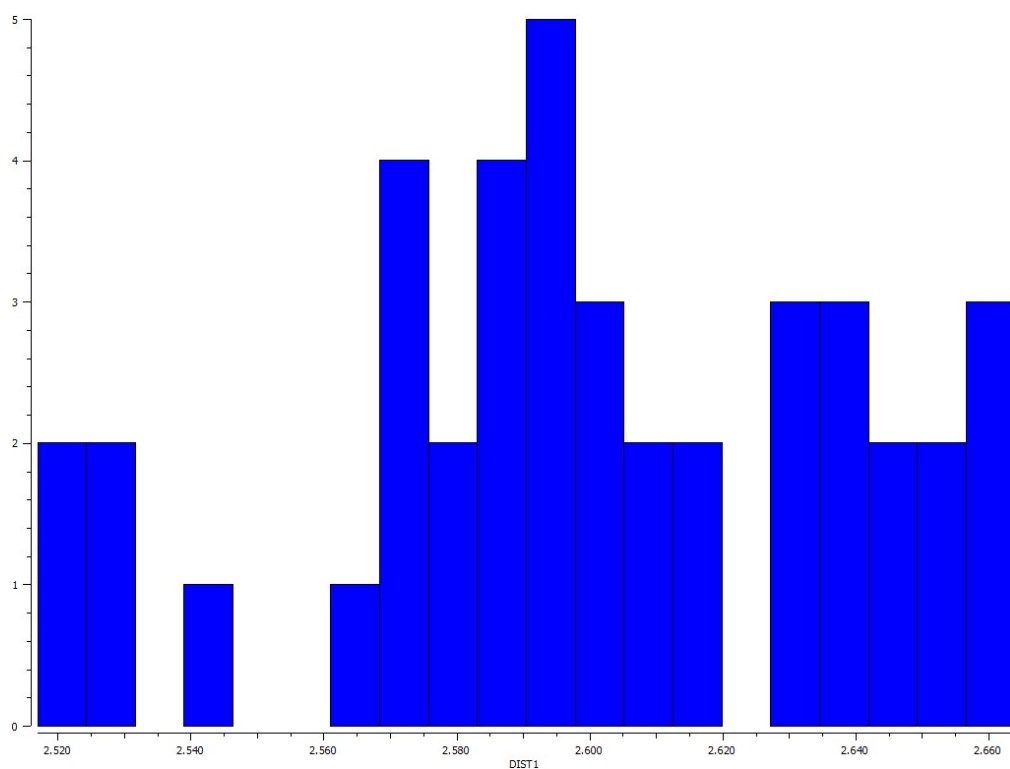

**Figure S10:** Histogram of all Al-Al single bonds between Al atoms that are fourfold coordinated and are not bound to other metals or hydrogen as listed in the CSD (version 5.43).<sup>[10]</sup>



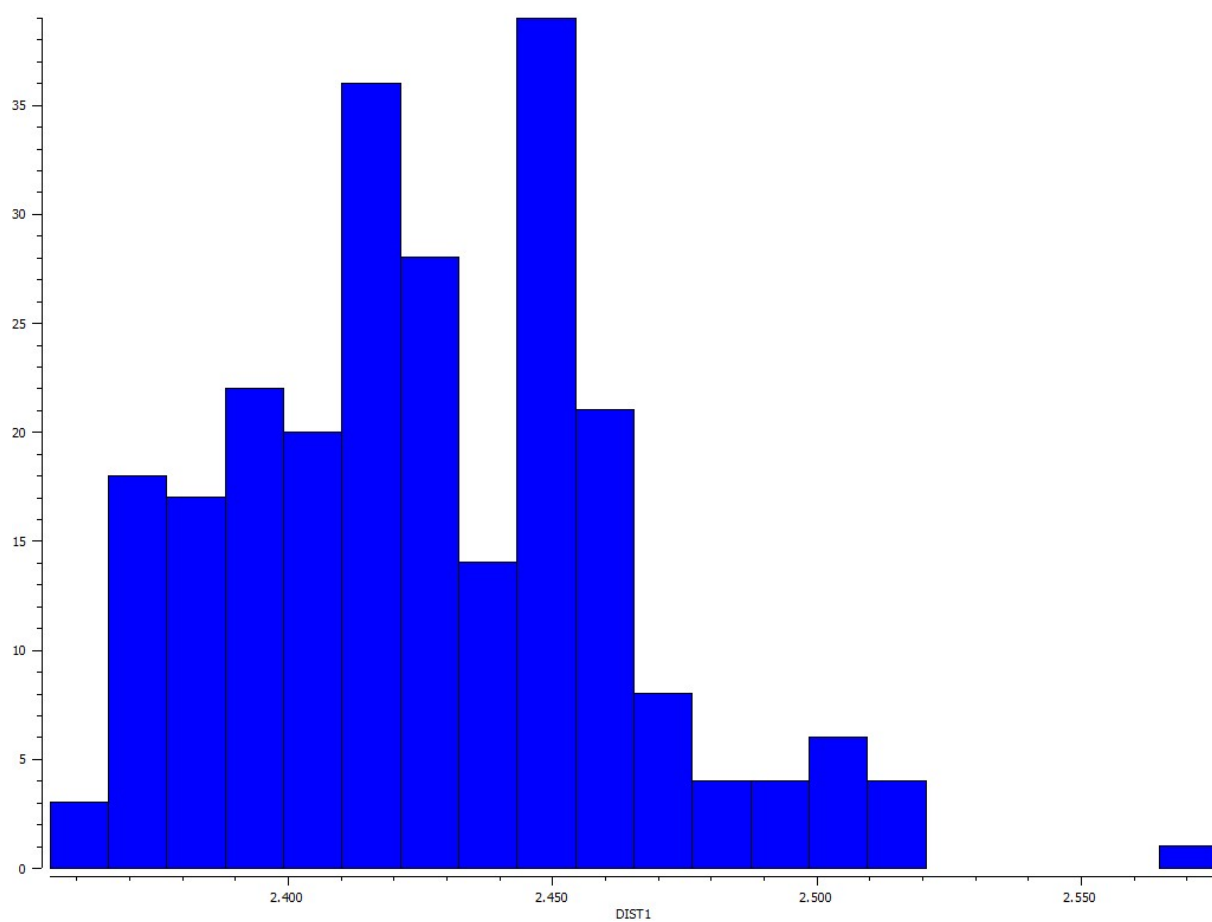

**Figure S11:** Histogram of all Ga-Ga single bonds between Ga atoms that are fourfold coordinated and are not bound to other metals or hydrogen as listed in the CSD (version 5.43).<sup>[10]</sup>

## Computational details

Density functional theoretical (DFT) calculations were carried out for the systems **1-4** at B3LYP/ECP(I),6-311++G\*\*<sup>11-14</sup> level of theory where the effective core potential (ECP) with double- $\zeta$  LANL2DZ was used for iodine and the 6-311++G\*\* basis set was used for the other atoms. The optimized geometry was characterized as a minimum by computing harmonic vibrational frequencies at the same level of theory. To understand the nature of bonding in these compounds, natural bond orbital (NBO) analysis<sup>15</sup> was carried out at the optimized geometries. QTAIM (quantum theory of atoms in molecules) calculations were also employed to characterize the electron distribution around selected bonds in **1-4**. All the calculations were carried out using Gaussian 16 suite of programs.<sup>16</sup> Multiwfn software was employed to do the QTAIM analysis.<sup>17</sup>

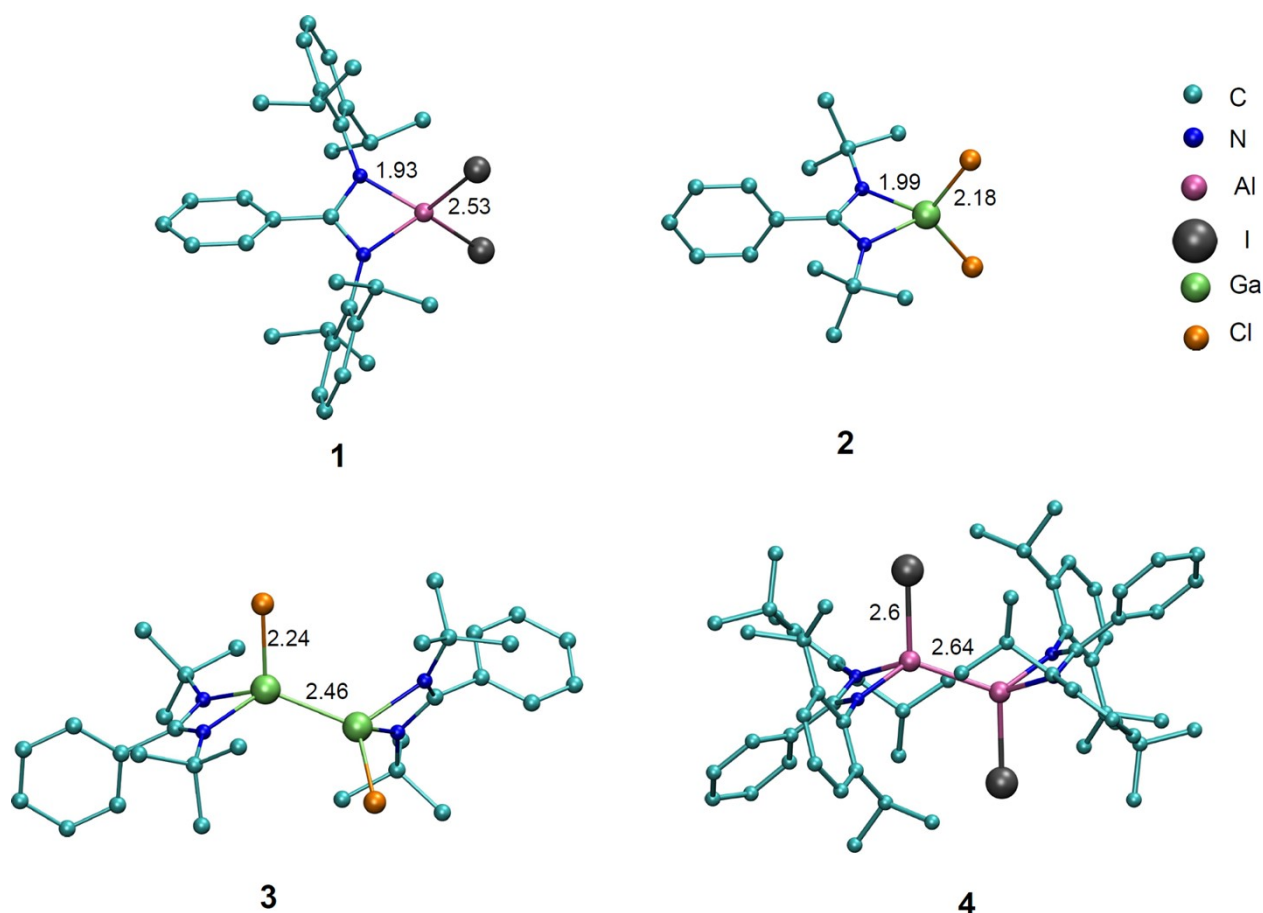

**Figure S12.** Optimized geometries of molecules **1**, **2**, **3**, and **4** obtained at the B3LYP/ECP(I),6-311++G\*\* level of theory. The hydrogen atoms are not shown for clarity. The important bond distances are indicated in Angstrom units.

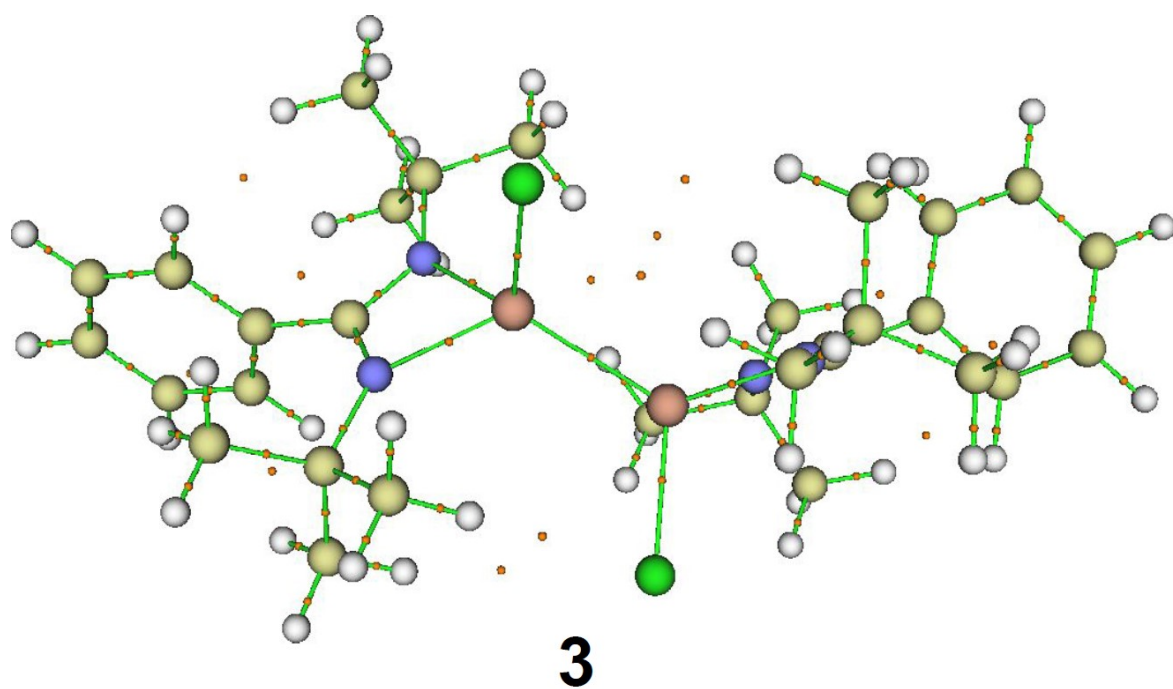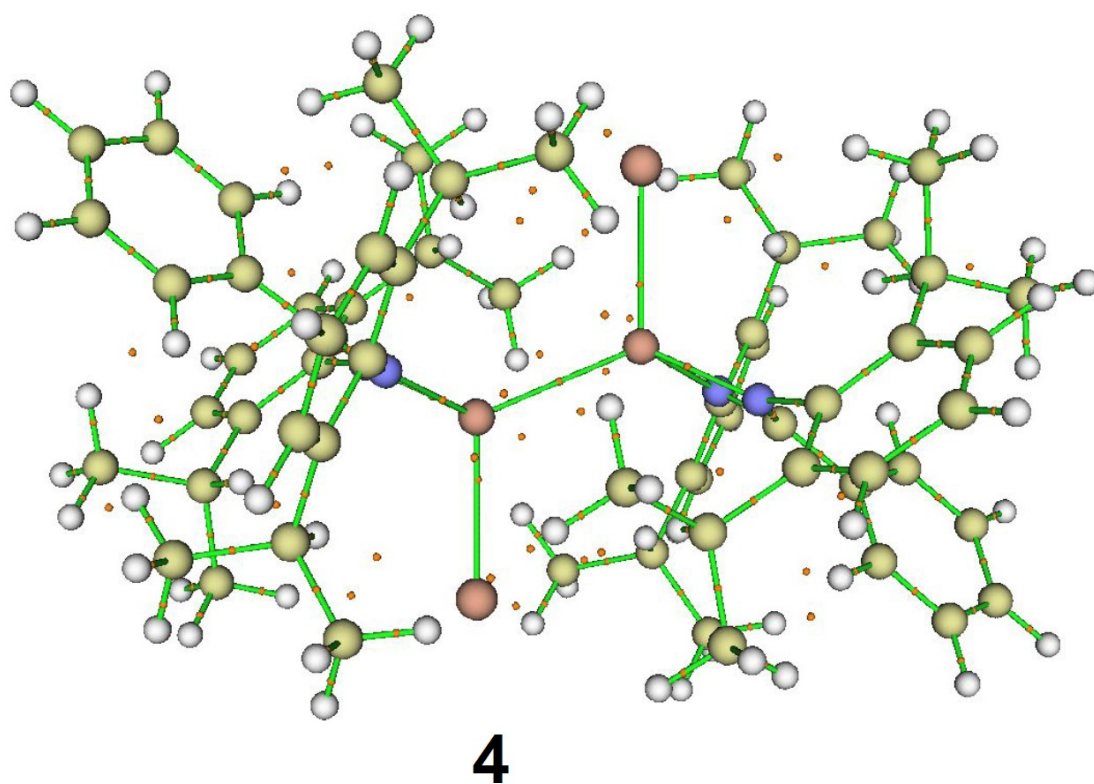

**Figure S13.** The location of (3,-1) BCPs in the molecule **3** and **4** obtained at B3LYP/ECP(I),6-311++G\*\* level of theory.

**Table S8.** Comparison of important geometrical parameters of molecules **1**, **2**, **3** and **4** obtained from experiments and calculations. r is for distance (Angs),  $\angle$  is for angle and d is for dihedral.

| <b>Molecule</b> | <b>Geometrical Parameter</b> | <b>Crystal Structure</b> | <b>Calculated</b> |
|-----------------|------------------------------|--------------------------|-------------------|
| <b>1</b>        | r Al-I(1)                    | 2.47                     | 2.53              |
|                 | r (Al-I2)                    | 2.47                     | 2.53              |
|                 | r (Al-N1)                    | 1.89                     | 1.93              |
|                 | r (Al-N2)                    | 1.89                     | 1.93              |
|                 | $\angle$ (I1-Al-I2)          | 114.0                    | 111.9             |
| <b>2</b>        | r (Ga-Cl1)                   | 2.14                     | 2.18              |
|                 | r (Ga-Cl2)                   | 2.14                     | 2.18              |
|                 | r (Ga-N1)                    | 1.94                     | 1.99              |
|                 | r (Ga-N2)                    | 1.94                     | 1.99              |
|                 | $\angle$ (Cl1-Ga-Cl2)        | 109.1                    | 114.5             |
| <b>3</b>        | r (Ga1-Ga2)                  | 2.41                     | 2.46              |
|                 | r (Ga1-Cl1)                  | 2.21                     | 2.24              |
|                 | r (Ga2-Cl2)                  | 2.21                     | 2.24              |
|                 | r (Ga1-N1)                   | 1.98                     | 2.02              |
|                 | r (Ga1-N2)                   | 1.98                     | 2.02              |
|                 | r (Ga2-N3)                   | 1.98                     | 2.02              |
|                 | r (Ga2-N4)                   | 1.98                     | 2.02              |

|          |                        |       |       |
|----------|------------------------|-------|-------|
|          | $\angle$ (Cl1-Ga1-Ga2) | 116.0 | 115.1 |
|          | $\angle$ (Cl2-Ga2-Ga1) | 116.0 | 115.1 |
|          | d (Cl1-Ga1-Ga2-Cl2)    | 100.8 | 121.2 |
| <b>4</b> | r (Al1-Al2)            | 2.58  | 2.64  |
|          | r (Al1-I1)             | 2.55  | 2.60  |
|          | r (Al2-I2)             | 2.55  | 2.60  |
|          | r (Al1-N1)             | 1.91  | 1.96  |
|          | r (Al1-N2)             | 1.95  | 1.99  |
|          | r (Al2-N3)             | 1.91  | 1.96  |
|          | r (Al2-N4)             | 1.95  | 1.99  |
|          | $\angle$ (I1-Al1-Al2)  | 118.1 | 112.0 |
|          | $\angle$ (I2-Al2-Al1)  | 118.1 | 112.0 |
|          | d (I1-Ga1-Ga2-I2)      | 180.0 | 180.0 |

**Table S9.** Results of NBO analysis obtained at the B3LYP/ECP(I),6-311++G\*\* level of theory.

| <b>Molecule</b> | <b>Bond</b>   | <b>Occupancy (<i>e</i>)</b> | <b>Atomic contribution</b>                                 |
|-----------------|---------------|-----------------------------|------------------------------------------------------------|
| <b>1</b>        | Al-I $\sigma$ | 1.957                       | Al: s(27.38%) p(70.93%) d(1.69%)<br>I: s(20.24%) p(79.76%) |

|          |                |       |                                                                        |
|----------|----------------|-------|------------------------------------------------------------------------|
| <b>2</b> | Ga-Cl $\sigma$ | 1.964 | Ga: s(27.03%) p(72.37%) d(0.60%)<br>Cl: s(22.44%) p(77.36%) d(0.20%)   |
| <b>3</b> | Ga-Ga $\sigma$ | 1.890 | Ga1: s(41.89%) p(57.81%) d(0.30%)<br>Ga2: s(41.89%) p(57.81%) d(0.30%) |
|          | Ga-Cl $\sigma$ | 1.965 | Ga1: s(20.0%) p(79.27%) d(0.74%)<br>Cl1: s(26.08%) p(73.78%) d(0.14%)  |
| <b>4</b> | Al-Al $\sigma$ | 1.821 | Al1: s(40.59%) p(59.01%) d(0.41%)<br>Al2: s(40.70%) p(58.90%) d(0.41%) |
|          | Al-I $\sigma$  | 1.936 | Al1: s(18.45%) p(79.34%) d(2.21%)<br>I1: s(27.89%) p(72.11%)           |

**Table S10.** Natural charges of important atoms in the molecules **1**, **2**, **3** and **4** at B3LYP/ECP(I),6-311++G\*\* level of theory.

| <b>Molecule</b> | <b>Atom</b> | <b>NPA charges</b> |
|-----------------|-------------|--------------------|
| <b>1</b>        | Al          | +1.199             |
|                 | I1          | -0.306             |
|                 | I2          | -0.306             |
|                 | N1          | -0.824             |
|                 | N2          | -0.824             |
| <b>2</b>        | Ga          | +1.394             |
|                 | Cl1         | -0.478             |

|          |     |        |
|----------|-----|--------|
|          | CI2 | -0.478 |
|          | N1  | -0.751 |
|          | N2  | -0.751 |
| <b>3</b> | Ga1 | +1.005 |
|          | Ga2 | +1.005 |
|          | CI1 | -0.535 |
|          | CI2 | -0.535 |
|          | N1  | -0.743 |
|          | N2  | -0.757 |
|          | N3  | -0.743 |
|          | N4  | -0.757 |
| <b>4</b> | A11 | +1.084 |
|          | A12 | +1.084 |
|          | I1  | -0.435 |
|          | I2  | -0.435 |
|          | N1  | -0.838 |
|          | N2  | -0.859 |
|          | N3  | -0.838 |
|          | N4  | -0.859 |

**Table S11.** The electron density ( $\rho(r)$ ), Laplacian ( $[\nabla^2\rho(r)]$ ), and ellipticity ( $\epsilon$ ) at the (3,-1) BCPs in **1**, **2**, **3** and **4** obtained from QTAIM calculations at the B3LYP/ECP(I),6-311++G\*\* level of theory.

| Molecule | Bond    | $\rho(r)$ | $[\nabla^2\rho(r)]$ | $\epsilon$ |
|----------|---------|-----------|---------------------|------------|
| <b>1</b> | Al-I1   | 0.055     | +0.752              | 0.003      |
| <b>2</b> | Ga-C11  | 0.089     | +0.172              | 0.001      |
| <b>3</b> | Ga1-Ga2 | 0.068     | -0.023              | 0.008      |
|          | Ga1-C11 | 0.078     | +0.146              | 0.011      |
| <b>4</b> | Al1-Al2 | 0.057     | -0.081              | 0.022      |
|          | Al1-I1  | 0.047     | +0.060              | 0.040      |

## References

- [1] M. M. Siddiqui, S. Banerjee, S. Bose, S. K. Sarkar, S. K. Gupta, J. Kretsch, N. Graw, R. Herbst-Irmer, D. Stalke, S. Dutta, D. Koley, H. W. Roesky, *Inorg. Chem.* **2020**, *59*, 11253–11258.
- [2] T. Schulz, K. Meindl, D. Leusser, D. Stern, M. Ruf, G. M. Sheldrick, D. Stalke, *J. Appl. Crystallogr.* **2009**, *42*, 885–891.
- [3] Bruker AXS Inc. in *Bruker Apex CCD, SAINT v8.38C* (Ed.: Bruker AXS Inst. Inc.) WI, USA, Madison, 2017.
- [4] L. Krause, R. Herbst-Irmer, G. M. Sheldrick, D. Stalke, *J. Appl. Crystallogr.* **2015**, *48*, 3-10.
- [5] M. Sevvana, M. Ruf, I. Usón, G. M. Sheldrick, R. Herbst-Irmer, *Acta Crystallogr.*, **2019**, *D75*, 1040-1050.
- [6] G. M. Sheldrick, *Acta Crystallogr.* **2015**, *A71*, 3-8.
- [7] G. M. Sheldrick, *Acta Crystallogr.* **2015**, *C71*, 3-8.



- [8] C. B. Hübschle, G. M. Sheldrick, B. Dittrich, *J. Appl. Crystallogr.* **2011**, *44*, 1281-1284.
- [9] S. Parsons, H. D. Flack, T. Wagner, Use of intensity quotients and differences in absolute structure refinement, *Acta Cryst. B*, **2013**, *69*, 249-259.
- [10] C. R. Groom, I. J. Bruno, M. P. Lightfoot and S. C. Ward, *Acta Cryst.* **2016**, *B72*, 171-179.
- [11] C. Lee, W. Yang and R. G. Parr, *Phys. Rev. B: Condens. Matter Mater. Phys.*, **1988**, *37*, 785-789.
- [12] A. D. Becke, *J. Phys. Chem.*, **1993**, *98*, 5648-5652.
- [13] T. Clark, J. Chandrasekhar, G. W. Spitznagel and P. V. R. Schleyer, *J. Comput. Chem.*, **1983**, *4*, 294-301.
- [14] R. Krishnan, J. S. Binkley, R. Seeger and J. A. Pople, *J. Chem. Phys.*, 1980, *72*, 650-654.
- [15] NBO 7.0. E. D. Glendening, J. K. Badenhoop, A. E. Reed, J. E. Carpenter, J. A. Bohmann, C. M. Morales, P. Karafiloglou, C. R. Landis, and F. Weinhold, Theoretical Chemistry Institute, University of Wisconsin, Madison (2018).
- [16] Gaussian 16, Revision A.03, M. J. Frisch, G. W. Trucks, H. B. Schlegel, G. E. Scuseria, M. A. Robb, J. R. Cheeseman, G. Scalmani, V. Barone, G. A. Petersson, H. Nakatsuji, X. Li, M. Caricato, A. V. Marenich, J. Bloino, B. G. Janesko, R. Gomperts, B. Mennucci, H. P. Hratchian, J. V. Ortiz, A. F. Izmaylov, J. L. Sonnenberg, D. Williams-Young, F. Ding, F. Lipparini, F. Egidi, J. Goings, B. Peng, A. Petrone, T. Henderson, D. Ranasinghe, V. G. Zakrzewski, J. Gao, N. Rega, G. Zheng, W. Liang, M. Hada, M. Ehara, K. Toyota, R. Fukuda, J. Hasegawa, M. Ishida, T. Nakajima, Y. Honda, O. Kitao, H. Nakai, T. Vreven, K. Throssell, J. A. Montgomery, Jr., J. E. Peralta, F. Ogliaro, M. J. Bearpark, J. J. Heyd, E. N. Brothers, K. N. Kudin, V. N. Staroverov, T. A. Keith, R. Kobayashi, J. Normand, K. Raghavachari, A. P. Rendell, J. C. Burant, S. S. Iyengar, J. Tomasi, M. Cossi, J. M. Millam, M. Klene, C. Adamo, R. Cammi, J. W. Ochterski, R. L. Martin, K. Morokuma, O. Farkas, J. B. Foresman, and D. J. Fox, Gaussian, Inc., Wallingford CT, 2016.
- [17] Tian Lu, Feiwu Chen, *J. Comput. Chem.*, **2012**, *33*, 580-592.
